# Supplementary material for: A new gain calibration protocol for Faraday amplifiers equipped with a 1013 Ω resistor
Source: Royal Society of Chemistry journal article supplement (doi:10.1039/d1ja00351h), 2022-01-01
Supplement: d1ja00351h1.pdf [file d1ja00351h1.pdf]

## Electronic Supplementary Information (ESI)

### New gain calibration protocol for Faraday amplifiers equipped with a $10^{13}$ $\Omega$ resistor

Hisashi Asanuma,<sup>a,b†</sup> Kota Yamamoto,<sup>b</sup> Yuta Kemuyama<sup>b</sup> and Takafumi Hirata<sup>b</sup>

- a. *Atmosphere and Ocean Research Institute, The University of Tokyo, Kashiwanoha 5-1-5, Kashiwa-shi, Chiba 277-8564, Japan.*
- b. *Geochemical Research Center, Graduate School of Science, The University of Tokyo, Hongo 7-3-1, Bunkyo-ku, Tokyo 113-0033, Japa*

Four supplementary tables are included.

**Table S1** Analysis solutions used in this study.

| Sample        | Element | ng · mL <sup>-1</sup> | Matrix                 |
|---------------|---------|-----------------------|------------------------|
| JNdi-1        | Nd      | 200                   | 2 wt% HNO <sub>3</sub> |
| NIST SRM 987  | Sr      | 75                    | 2 wt% HNO <sub>3</sub> |
| JMC 475       | Hf      | 150                   | 2 wt% HCl              |
| NIST SRM 3163 | W       | 12                    | 2 wt% HNO <sub>3</sub> |
| NIST SRM 981  | Pb      | 100                   | 2 wt% HNO <sub>3</sub> |
| NIST SRM 982  | Pb      | 130                   | 2 wt% HNO <sub>3</sub> |

**Table S2** Instrumentation and operational settings. Idle time is a settling time between analytical blocks.

|                       |                                                   |                                                                                                                                                                                 |
|-----------------------|---------------------------------------------------|---------------------------------------------------------------------------------------------------------------------------------------------------------------------------------|
|                       | Roundabout calibration                            | Sr, W, Hf, and Pb isotopic analysis                                                                                                                                             |
|                       | Neptune XT<br>(Thermo Fisher Scientific, Germany) |                                                                                                                                                                                 |
| <b>Instrument</b>     | ICPMS                                             |                                                                                                                                                                                 |
|                       | RF power                                          | 1200 W                                                                                                                                                                          |
|                       | Cooling gas flow                                  | 15 L · min <sup>-1</sup>                                                                                                                                                        |
|                       | Auxiliary gas flow                                | 0.75 L · min <sup>-1</sup>                                                                                                                                                      |
|                       | Nebuliser gas                                     | 1.0-1.1 L · min <sup>-1</sup>                                                                                                                                                   |
|                       | Sample uptake                                     | 110 µL · min <sup>-1</sup>                                                                                                                                                      |
|                       | Cone                                              | Nickel standard sample and high-performance skimmer cones                                                                                                                       |
|                       | Guard electrode                                   | On                                                                                                                                                                              |
|                       | Resolving power                                   | Sr, Nd, Hf, and Pb >13,000<br>W = 2,000                                                                                                                                         |
|                       | Integration time                                  | 8.389 s                                                                                                                                                                         |
| Blank acquisition     | one block<br>(27 cycles)                          | three blocks<br>(27 cycles)                                                                                                                                                     |
|                       | six blocks<br>(27 cycles)                         | 15 blocks<br>(27 cycles)                                                                                                                                                        |
| Sample acquisition    |                                                   |                                                                                                                                                                                 |
| Idle time             | 25 s                                              |                                                                                                                                                                                 |
| <b>Data reduction</b> | Mass bias correction                              | Exponential law                                                                                                                                                                 |
|                       | Tau correction                                    | Made                                                                                                                                                                            |
|                       | Uncertainties ( <i>s</i> )                        | Uncertainties ( <i>s</i> ) is calculated by simple standard deviation of isotopic data obtained from a total of six or 15 block measurements (27 data points per single block). |

**Table S3** Gains of  $10^{13} \Omega$  amplifiers obtained by a roundabout method. After performing analysis according to configurations 1 to 5, the five gains were evaluated per Faraday amplifier. Errors were based on uncertainties (2s) on the isotopic measurements.  $G_{\text{round}}$  was calculated as a weighted mean of the gains of individual Nd isotopic data, except for  $^{142}\text{Nd}/^{144}\text{Nd}$  isotopic data. MSWD means mean square of the weighted deviates.

|                            |                                        | Amp 6            | Amp 7            | Amp 8            | Amp 9            |
|----------------------------|----------------------------------------|------------------|------------------|------------------|------------------|
| 2<br>3<br>4<br>5<br>6<br>7 | Campaign 1                             |                  |                  |                  |                  |
|                            | $^{142}\text{Nd}/^{144}\text{Nd}$ (2s) | 0.00974405 (271) | 0.01019874 (116) | 0.00981310 (184) | 0.00981575 (106) |
|                            | $^{143}\text{Nd}/^{144}\text{Nd}$ (2s) | 0.00974313 (81)  | 0.01019826 (156) | 0.00981288 (86)  | 0.00981429 (176) |
|                            | $^{145}\text{Nd}/^{144}\text{Nd}$ (2s) | 0.00974269 (102) | 0.01019817 (86)  | 0.00981261 (193) | 0.00981441 (109) |
|                            | $^{148}\text{Nd}/^{144}\text{Nd}$ (2s) | 0.00974324 (101) | 0.01019754 (101) | 0.00981210 (158) | 0.00981300 (148) |
| 8                          | Campaign 2                             |                  |                  |                  |                  |
|                            | $^{150}\text{Nd}/^{144}\text{Nd}$ (2s) | 0.00974302 (158) | 0.01019884 (160) | 0.00981198 (244) | 0.00981357 (213) |
|                            | $^{142}\text{Nd}/^{144}\text{Nd}$ (2s) | 0.00974345 (184) | 0.01019924 (132) | 0.00981407 (128) | 0.00981700 (123) |
|                            | $^{143}\text{Nd}/^{144}\text{Nd}$ (2s) | 0.00974330 (77)  | 0.01019836 (113) | 0.00981281 (105) | 0.00981420 (107) |
|                            | $^{145}\text{Nd}/^{144}\text{Nd}$ (2s) | 0.00974326 (109) | 0.01019805 (107) | 0.00981217 (120) | 0.00981370 (111) |
|                            | $^{148}\text{Nd}/^{144}\text{Nd}$ (2s) | 0.00974251 (95)  | 0.01019792 (104) | 0.00981170 (154) | 0.00981320 (107) |
|                            | $^{150}\text{Nd}/^{144}\text{Nd}$ (2s) | 0.00974331 (204) | 0.01019808 (216) | 0.00981214 (215) | 0.00981377 (213) |
|                            | $G_{\text{round}}$ (2SE)               | 0.00974305 (35)  | 0.01019808 (40)  | 0.00981248 (47)  | 0.00981380 (46)  |
|                            | MSWD                                   | 0.38             | 0.35             | 0.44             | 0.66             |

**Table S4** Gain ( $G_{\text{ccc}}$ ) obtained using a 3.3 pA constant current generator.

| Amp 2 ( $10^{11} \Omega$ ) | Amp 3 ( $10^{11} \Omega$ ) | Amp 4 ( $10^{11} \Omega$ ) | Amp 5 ( $10^{11} \Omega$ ) | Amp 6 ( $10^{13} \Omega$ ) | Amp 7 ( $10^{13} \Omega$ ) | Amp 8 ( $10^{13} \Omega$ ) | Amp 9 ( $10^{13} \Omega$ ) |
|----------------------------|----------------------------|----------------------------|----------------------------|----------------------------|----------------------------|----------------------------|----------------------------|
| 0.979419                   | 0.982994                   | 0.979888                   | 0.983465                   | 0.00974067                 | 0.01019553                 | 0.00981356                 | 0.00981653                 |
| 0.979406                   | 0.982989                   | 0.979868                   | 0.983455                   | 0.00974068                 | 0.01019559                 | 0.00981365                 | 0.00981629                 |
| 0.979416                   | 0.982994                   | 0.979894                   | 0.983470                   | 0.00974088                 | 0.01019574                 | 0.00981356                 | 0.00981637                 |
| 0.979406                   | 0.983000                   | 0.979887                   | 0.983457                   | 0.00974081                 | 0.01019573                 | 0.00981342                 | 0.00981651                 |
| 0.979415                   | 0.983004                   | 0.979886                   | 0.983460                   | 0.00974074                 | 0.01019561                 | 0.00981319                 | 0.00981639                 |
| Mean (2s)                  |
| 0.979413 (12)              | 0.982996 (12)              | 0.979884 (19)              | 0.983461 (12)              | 0.00974076 (18)            | 0.01019564 (18)            | 0.00981347 (36)            | 0.00981642 (20)            |

9
